# Supplementary material for: Additional Evidence Implicating GPD1L in the Pathogenesis of Brugada Syndrome in A Large Multi-generational Family
Source: bioRxiv or medRxiv preprint supplement (doi:10.1101/2022.09.17.22280058), 2022-09-20

Supplemental Table 1: Illumina Global Sequencing Array Call Rate

| <b>Sample</b> | <b>Call Rate</b> |
|---------------|------------------|
| 1             | 0.9955           |
| 2             | 0.9937           |
| 3             | 0.9955           |
| 4             | 0.9950           |
| 5             | 0.9948           |
| 6             | 0.9953           |
| 7             | 0.9955           |
| 8             | 0.9954           |
| 9             | 0.9955           |
| 10            | 0.9919           |
| 11            | 0.9923           |
| 12            | 0.9865           |
| 13            | 0.9938           |
| 14            | 0.9954           |
| 15            | 0.9955           |

Supplemental Figure 1: **Whole exome sequencing coverage.** Good coverage was achieved for the Agilent SureSelect V6+UTR kit, with >80% of bases covered above 50x.

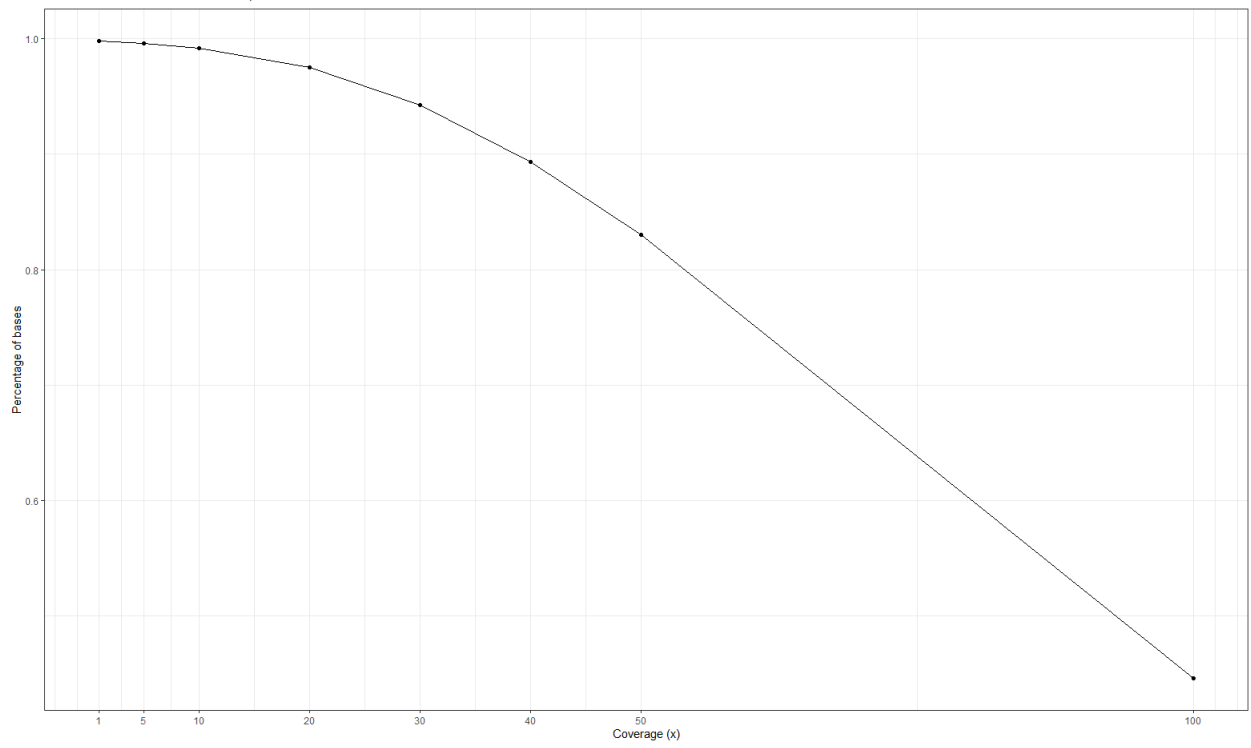

Supplemental Table 2: Whole exome sequencing metrics

**Number of variants** 166834

**Variants by type**

---

| Type | Count  | Percent |
|------|--------|---------|
| DEL  | 14624  | 8.77    |
| INS  | 12256  | 7.35    |
| SNP  | 139954 | 83.89   |

**Variants by effect**

---

| Effect   | Count | Percent |
|----------|-------|---------|
| MISSENSE | 34535 | 47.26   |
| NONSENSE | 308   | 0.42    |
| SILENT   | 38238 | 52.32   |

Supplemental Table 3: Primers used for Sanger Sequencing of Brugada Syndrome Risk SNPs

| Primer        | Gene   | Sequence                |
|---------------|--------|-------------------------|
| rs11708996 F1 | SCN5A  | TGTTGAGTTGTAGGGTACACAGT |
| rs11708996 R1 | SCN5A  | GGGATTGGGAAGGCCTTCAA    |
| rs11708996 F2 | SCN5A  | ATGTTGATTCCAGTTTCCCCT   |
| rs11708996 R2 | SCN5A  | TGAACTCACTACCACAAACTGGA |
| rs10428132 F1 | SCN10A | CAGAGCAAATGGAGCAAGGC    |
| rs10428132 R1 | SCN10A | CCAGTTCACCAGTCTCCGTC    |
| rs9388451 F1  | HEY2   | CGAGGTGCCAGGGGTTTTTA    |
| rs9388451 R1  | HEY2   | GCGAGGAGAATACCAGAGGC    |
| rs9388451 F2  | HEY2   | CCACAGTGACATGATCCAGGT   |
| rs9388451 R2  | HEY2   | GGAACATGTGCAAGGCCTTG    |

Supplemental Figure 2: **GPD1L-A280V PyMol Rotamers**. The AlphaFold predicted model for GPD1L was mutated in PyMol to GPD1L-A280V. Red octagons indicate steric hinderance within GPD1L. A) PyMol predicted rotamer 1 of 3 with a calculated strain of of 14.29. B) PyMol predicated rotamer 2 of 3 with a calculated strain of 14.63. C) PyMol predicted rotamer 3 of 3 20.07

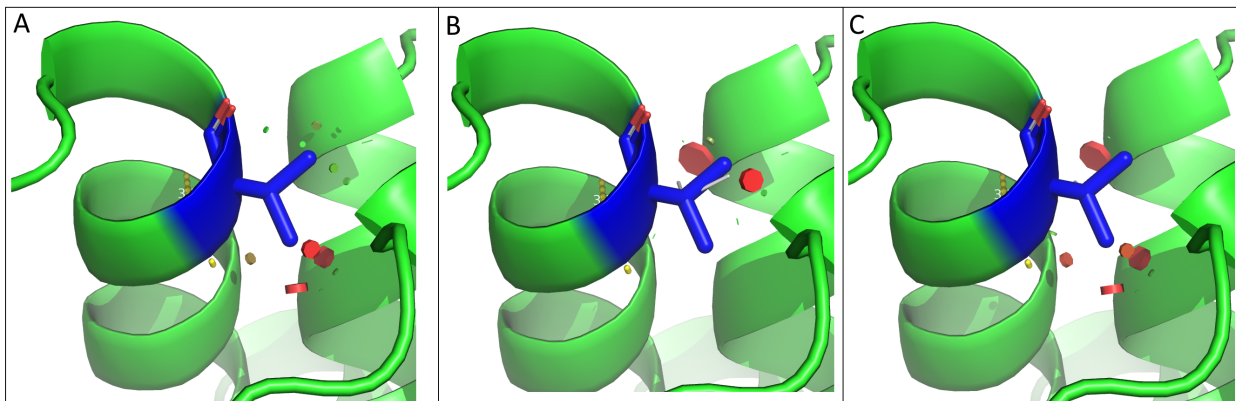

Supplement: Supplementary file [file media-1.pdf]
